# Supplementary figures and images for: Identification and Validation of Prognosis-Related Necroptosis Genes for Prognostic Prediction in Hepatocellular Carcinoma
Source: Hindawi journal article supplement (doi:10.1155/2022/3172099), 2022-06-29

A

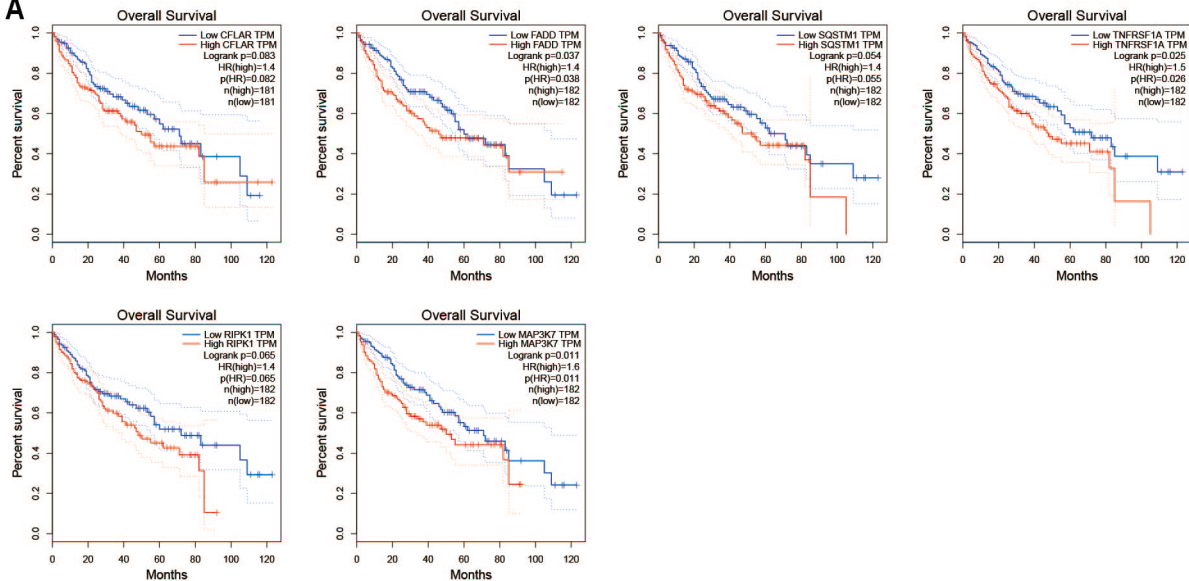

B

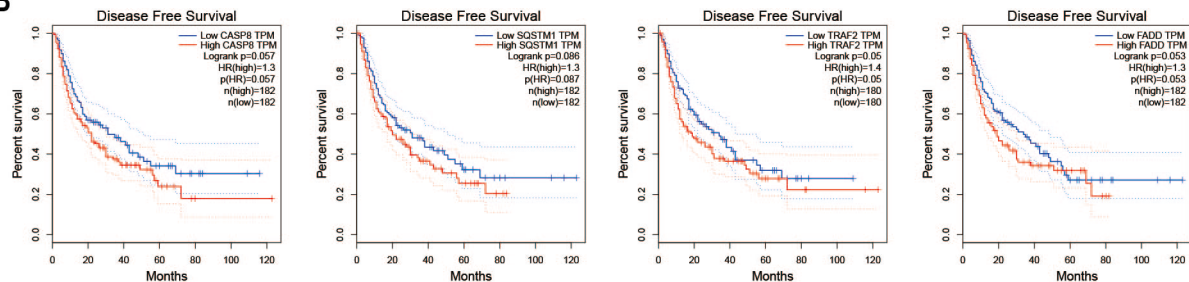

Supplement: f1 [file 3172099.f1.zip]

**A**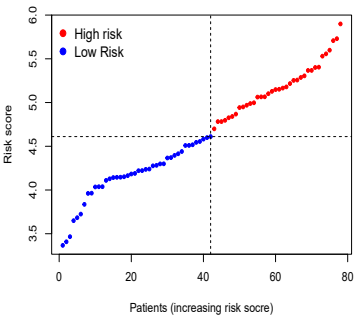**B**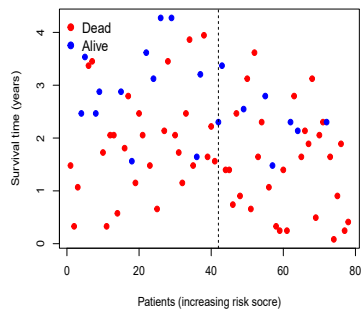**C**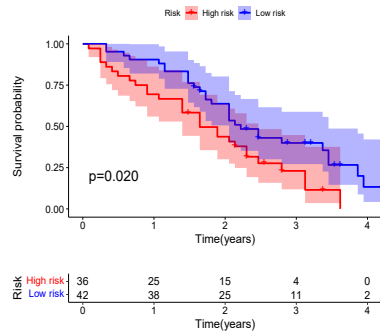**D**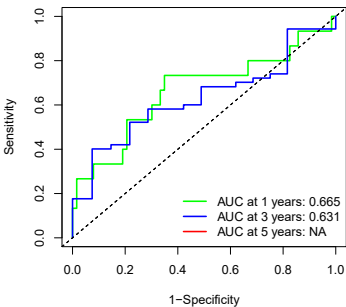**E**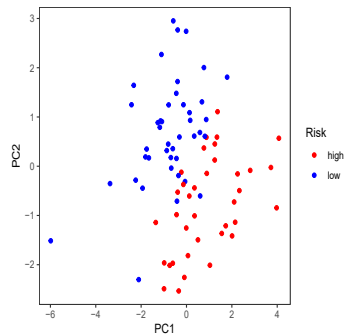

Supplement: f1 [file 3172099.f1.zip]
